# Supplementary material
Source: PubMed Central journal article supplement (PMC7240275)
Supplement: mmc1.pdf [file mmc1.pdf]

**Online Appendix for “Infected Markets: Novel Coronavirus, Government Interventions, and  
Stock Return Volatility around the Globe”**

*Adam Zaremba, Renatas Kizys, David Y. Aharon, Ender Demir*

**Abstract**

The Online Appendix provides additional exhibits for the study. Table A1 presents the constructions of asset pricing factors used in the study. Table A2 demonstrates the statistical properties of the factor returns. Table A3 summarizes all the variables employed in the study. Table A4 displays correlation coefficients between these variables. Finally, Figure A1 shows factor performance through time.

**Table A1. Construction of Asset Pricing Factors Used in the Study**

The table presents the calculation procedures of the asset pricing factors used in the study. The procedures depart from the original studies of Fama-French (1993) and Carhart (1997) in several ways. First, due to the limited size of our universe, we use single sorts on the return predictive signal (e.g., market value, momentum) rather than two-way sorts on the signal and market value. Second, for momentum, we do not drop the most recent month from the estimation period because the equity indices do not display the short-run reversal effect (Zaremba, Long, and Karathanasopoulos 2019). Third, following numerous country-level asset pricing studies, we use the earnings-to-price ratio rather than the book-to-market ratio to form the high-minus-low factor, as this valuation measure provides better coverage (e.g., Umutlu 2015).

| Asset pricing factor | Acronym | Calculation details                                                                                                                                                                                                                                                                                                                                                          |
|----------------------|---------|------------------------------------------------------------------------------------------------------------------------------------------------------------------------------------------------------------------------------------------------------------------------------------------------------------------------------------------------------------------------------|
| Market               | MKT     | MKT, the excess return on the market, is the value-weighted return of all the indices in the sample on day $t$ minus the risk-free rate, i.e., the one-month U.S. T-Bill return.                                                                                                                                                                                             |
| Small Minus Big      | SMB     | We rank all the indices on their total stock market capitalization in U.S. dollars on day $t-1$ . The small-minus-big (SMB) factor return is represented by the return on a zero-investment portfolio buying (selling) 30% of the indices with the lowest (highest) market capitalization.                                                                                   |
| High Minus Low       | HML     | We rank all the indices on their earnings-to-price (E/P) ratio on day $t$ , where E/P is the total stock market capitalization of an index divided by a trailing 12-month aggregated net profit. The high-minus-low (HML) factor return is represented by the return on a zero-investment portfolio buying (selling) 30% of the indices with the highest (lowest) E/P ratio. |
| Winners Minus Losers | WML     | We rank all the indices on their trailing 250-trading day total returns. The winners-minus-losers (WML) factor return is represented by the return on a zero-investment portfolio buying (selling) the indices with 30% of the highest (lowest) past returns.                                                                                                                |

**Table A2. Statistical Properties of Factor Returns**

The table reports the performance of the asset pricing factors used in this study: market excess return (MKT), high minus low (HML), small minus big (SMB), and winners minus losers (WML). The detailed factor construction method is presented in Table A1 in the Online Appendix and the study period is 1 January – 3 April 2020. The values in parentheses are *t*-statistics and the asterisks \*, \*\*, and \*\*\* indicate statistical significance at the 5%, 1%, and 0.1% levels, respectively. Panel A demonstrates basic descriptive statistics, and Panel B presents Pearson's product-moment pairwise correlation coefficients.

|                                          | MKT              | HML                 | SMB                  | WML                  |
|------------------------------------------|------------------|---------------------|----------------------|----------------------|
| <i>Panel A: Descriptive statistics</i>   |                  |                     |                      |                      |
| Average                                  | -0.61<br>(-1.77) | -0.06<br>(-0.17)    | -0.11<br>(-0.60)     | 0.10<br>(0.32)       |
| Standard deviation                       | 2.62             | 1.99                | 1.86                 | 2.18                 |
| Minimum                                  | -9.40            | -6.32               | -7.47                | -5.99                |
| Maximum                                  | 7.66             | 5.27                | 4.13                 | 7.17                 |
| Skewness                                 | -0.47            | -0.28               | -1.06                | 0.09                 |
| Kurtosis                                 | 3.20             | 2.03                | 3.05                 | 1.38                 |
| <i>Panel B: Correlation coefficients</i> |                  |                     |                      |                      |
| HML                                      |                  | -0.45***<br>(-4.12) | -0.88***<br>(-15.13) | 0.63***<br>(6.60)    |
| SMB                                      |                  |                     | 0.69***<br>(7.80)    | -0.71***<br>(-8.16)  |
| WML                                      |                  |                     |                      | -0.78***<br>(-10.14) |

**Table A3. Variables Used in the Study**

The table presents the variables used in this research. “Variable” indicates the symbol used in the study. “Data source” denotes the source of the original data utilized to calculate the variable.

| Variable                                     | Name                              | Computation details                                                                                                                                                                                                          | Data source                                        |
|----------------------------------------------|-----------------------------------|------------------------------------------------------------------------------------------------------------------------------------------------------------------------------------------------------------------------------|----------------------------------------------------|
| <i>Volatility indicators</i>                 |                                   |                                                                                                                                                                                                                              |                                                    |
| log R                                        | Absolute return                   | Logarithm of an absolute daily return on day $t$ .                                                                                                                                                                           | Datastream                                         |
| log RR <sub>CAPM</sub>                       | CAPM residual                     | Logarithm of an absolute residual return from the CAPM model on day $t$ .                                                                                                                                                    | Datastream                                         |
| log RR <sub>FF</sub>                         | FF (1993) residual                | Logarithm of an absolute residual return from the three-factor model of Fama and French (1993) on day $t$ .                                                                                                                  | Datastream                                         |
| log RR <sub>AMP</sub>                        | AMP (2013) residual               | Logarithm of an absolute residual return from the three-factor model of Asness, Moskowitz, and Pedersen (2013) on day $t$ .                                                                                                  | Datastream                                         |
| log RR <sub>CAPM</sub>                       | CAR (1997) residual               | Logarithm of an absolute residual return from the four-factor model of Carhart (1997) on day $t$ .                                                                                                                           | Datastream                                         |
| <i>Government policy response indicators</i> |                                   |                                                                                                                                                                                                                              |                                                    |
| SI                                           | Stringency index                  | COVID-19 Government Response Stringency Index (Stringency Index) on day $t$ aggregated based on different government non-pharmaceutical interventions and rescaled to create a score between 0 and 100.                      | Oxford COVID-19 Government Response Tracker        |
| PR1                                          | School closing                    | Variable taking a value of 0 when no measures are in place on day $t$ , 1 when school closing is recommended, and 2 when it is required.                                                                                     | Oxford COVID-19 Government Response Tracker        |
| PR2                                          | Workplace closing                 | Variable taking a value of 0 when no measures are in place on day $t$ , 1 when workplace closing is recommended, and 2 when it is required.                                                                                  | Oxford COVID-19 Government Response Tracker        |
| PR3                                          | Cancelled public events           | Variable taking a value of 0 when no measures are in place on day $t$ , 1 when cancelling public events is recommended, and 2 when it is required.                                                                           | Oxford COVID-19 Government Response Tracker        |
| PR4                                          | Closed public transport           | Variable taking a value of 0 when no measures are in place on day $t$ , 1 when the closing of public transport is recommended, and 2 when it is required.                                                                    | Oxford COVID-19 Government Response Tracker        |
| PR5                                          | Public information campaigns      | Variable taking the value of 1 if COVID-19 public information campaign is running in the country on day $t$ , or 0 otherwise.                                                                                                | Oxford COVID-19 Government Response Tracker        |
| PR6                                          | Restrictions on internal movement | Variable taking a value of 0 when no measures are in place on day $t$ , 1 when restrictions on internal movement are recommended, and 2 when they are required.                                                              | Oxford COVID-19 Government Response Tracker        |
| PR7                                          | International travel controls     | Variable taking a value of 0 when no measures are in place on day $t$ , 1 when screening is applied, 2 when there is also a policy on quarantine on high-risk regions, and 3 when travelling to high-risk regions is banned. | Oxford COVID-19 Government Response Tracker        |
| <i>Control variables</i>                     |                                   |                                                                                                                                                                                                                              |                                                    |
| log(TV)                                      | Trading volume                    | Logarithm of dollar trading volume (quantity of stocks times their price) traded on day $t$ expressed in U.S. dollars.                                                                                                       | Datastream                                         |
| log(MV)                                      | Market capitalization             | Logarithm of the market value of the broad index portfolio on day $t-1$ expressed in U.S. dollars.                                                                                                                           | Datastream                                         |
| log(PE)                                      | P/E ratio                         | Logarithm of the ratio of current price to 12-month trailing earnings per share.                                                                                                                                             | Datastream                                         |
| INF                                          | COVID-19 cases                    | The daily change of the total number of confirmed COVID-19 cases in a given country on day $t$ .                                                                                                                             | European Centre for Disease Prevention and Control |
| DTH                                          | COVID-19 deaths                   | The daily change of the total number of deaths resulting from COVID-19 in a given country on day $t$ .                                                                                                                       | European Centre for Disease Prevention and Control |
| ShortBan                                     | Short-selling ban                 | Variable taking a value of 1 when short-selling is banned on day $t$ , and 0 otherwise.                                                                                                                                      | European Securities and Markets Authority          |
| ShortNote                                    | Short-selling notification        | Variable taking a value of 1 if on day $t$ investors are obliged to report short positions exceeding 0.1% of the company's share capital to a local supervisory authority.                                                   | European Securities and Markets Authority          |

**Table A4. Statistical Properties of the Variables**

The table presents the Pearson’s product-moment pairwise correlation coefficients between all the variables considered in the study: the logarithms of absolute daily returns ( $\log|R|$ ), as well as logarithms absolute residual returns from four different models: CAPM ( $\log|RR_{CAPM}|$ ), the Fama-French (1993) model ( $\log|RR_{FF}|$ ), the Asness, Moskowitz, and Pedersen (2013) model ( $\log|RR_{AMP}|$ ), or the Carhart (1997) model ( $\log|RR_{CAR}|$ ). Government Policy Response Stringency Index ( $SI$ ) and its sub-components reflecting different interventions: school closing ( $PR1$ ), workplace closing ( $PR2$ ), cancelling of public events ( $PR3$ ), closing of public transportation ( $PR4$ ), public information campaigns ( $PR5$ ), restrictions of internal movement ( $PR6$ ), and international travel controls ( $PR7$ ); the logarithm of daily dollar trading volume expressed in USD ( $\log(TV)$ ), the logarithm of market value in USD ( $\log(MV)$ ), the logarithm of market-wide PE ratio ( $\log(PE)$ ), daily changes in numbers of new COVID-19 infections and deaths ( $\Delta INF$ ,  $\Delta DTH$ );  $ShortBan$  indicates short-selling ban, and  $ShortNote$  indicates a requirement to notify large short position to a local market regulator.

|                   | $\log R $ | $\log RR_{CAPM} $ | $\log RR_{FF} $ | $\log RR_{AMP} $ | $\log RR_{CAR} $ | $SI$  | $PR1$ | $PR2$ | $PR3$ | $PR4$ | $PR5$ | $PR6$ | $PR7$ | $\log(TV)$ | $\log(MV)$ | $\log(PE)$ | $\Delta INF$ | $\Delta DTH$ | $ShortBan$ |  |
|-------------------|-----------|-------------------|-----------------|------------------|------------------|-------|-------|-------|-------|-------|-------|-------|-------|------------|------------|------------|--------------|--------------|------------|--|
| $\log RR_{CAPM} $ | 0.58      |                   |                 |                  |                  |       |       |       |       |       |       |       |       |            |            |            |              |              |            |  |
| $\log RR_{FF} $   | 0.53      | 0.73              |                 |                  |                  |       |       |       |       |       |       |       |       |            |            |            |              |              |            |  |
| $\log RR_{AMP} $  | 0.53      | 0.70              | 0.88            |                  |                  |       |       |       |       |       |       |       |       |            |            |            |              |              |            |  |
| $\log RR_{CAR} $  | 0.52      | 0.74              | 0.83            | 0.91             |                  |       |       |       |       |       |       |       |       |            |            |            |              |              |            |  |
| $SI$              | 0.31      | 0.32              | 0.29            | 0.29             | 0.29             |       |       |       |       |       |       |       |       |            |            |            |              |              |            |  |
| $PR1$             | 0.29      | 0.29              | 0.26            | 0.26             | 0.27             | 0.90  |       |       |       |       |       |       |       |            |            |            |              |              |            |  |
| $PR2$             | 0.23      | 0.25              | 0.21            | 0.21             | 0.22             | 0.83  | 0.78  |       |       |       |       |       |       |            |            |            |              |              |            |  |
| $PR3$             | 0.33      | 0.32              | 0.28            | 0.28             | 0.29             | 0.90  | 0.85  | 0.75  |       |       |       |       |       |            |            |            |              |              |            |  |
| $PR4$             | 0.10      | 0.15              | 0.13            | 0.15             | 0.16             | 0.63  | 0.55  | 0.65  | 0.53  |       |       |       |       |            |            |            |              |              |            |  |
| $PR5$             | 0.28      | 0.28              | 0.27            | 0.26             | 0.26             | 0.73  | 0.55  | 0.46  | 0.60  | 0.32  |       |       |       |            |            |            |              |              |            |  |
| $PR6$             | 0.23      | 0.23              | 0.22            | 0.22             | 0.22             | 0.83  | 0.78  | 0.72  | 0.77  | 0.57  | 0.50  |       |       |            |            |            |              |              |            |  |
| $PR7$             | 0.28      | 0.27              | 0.26            | 0.24             | 0.24             | 0.81  | 0.66  | 0.53  | 0.69  | 0.36  | 0.64  | 0.59  |       |            |            |            |              |              |            |  |
| $\log(TV)$        | 0.19      | 0.08              | 0.07            | 0.04             | 0.03             | 0.11  | 0.09  | 0.07  | 0.12  | -0.01 | 0.14  | 0.04  | 0.19  |            |            |            |              |              |            |  |
| $\log(MV)$        | 0.08      | -0.03             | -0.03           | -0.05            | -0.07            | 0.00  | -0.01 | -0.03 | 0.02  | -0.09 | 0.04  | -0.04 | 0.10  | 0.92       |            |            |              |              |            |  |
| $\log(PE)$        | -0.06     | -0.09             | -0.09           | -0.10            | -0.09            | -0.22 | -0.20 | -0.17 | -0.22 | -0.22 | -0.12 | -0.20 | -0.14 | 0.31       | 0.35       |            |              |              |            |  |
| $\Delta INF$      | 0.08      | 0.04              | 0.02            | 0.01             | 0.01             | 0.22  | 0.20  | 0.21  | 0.23  | 0.12  | 0.13  | 0.27  | 0.15  | 0.15       | 0.16       | 0.01       |              |              |            |  |
| $\Delta DTH$      | 0.05      | 0.03              | 0.02            | 0.02             | 0.02             | 0.22  | 0.19  | 0.23  | 0.20  | 0.15  | 0.12  | 0.25  | 0.13  | 0.12       | 0.11       | -0.01      | 0.74         |              |            |  |
| $ShortBan$        | 0.07      | 0.05              | 0.04            | 0.06             | 0.06             | 0.23  | 0.20  | 0.21  | 0.20  | 0.14  | 0.12  | 0.23  | 0.15  | 0.07       | 0.04       | -0.05      | 0.24         | 0.40         |            |  |
| $ShortNote$       | 0.16      | 0.14              | 0.09            | 0.11             | 0.11             | 0.42  | 0.38  | 0.37  | 0.42  | 0.24  | 0.24  | 0.33  | 0.28  | -0.06      | -0.11      | -0.17      | 0.18         | 0.23         | 0.42       |  |

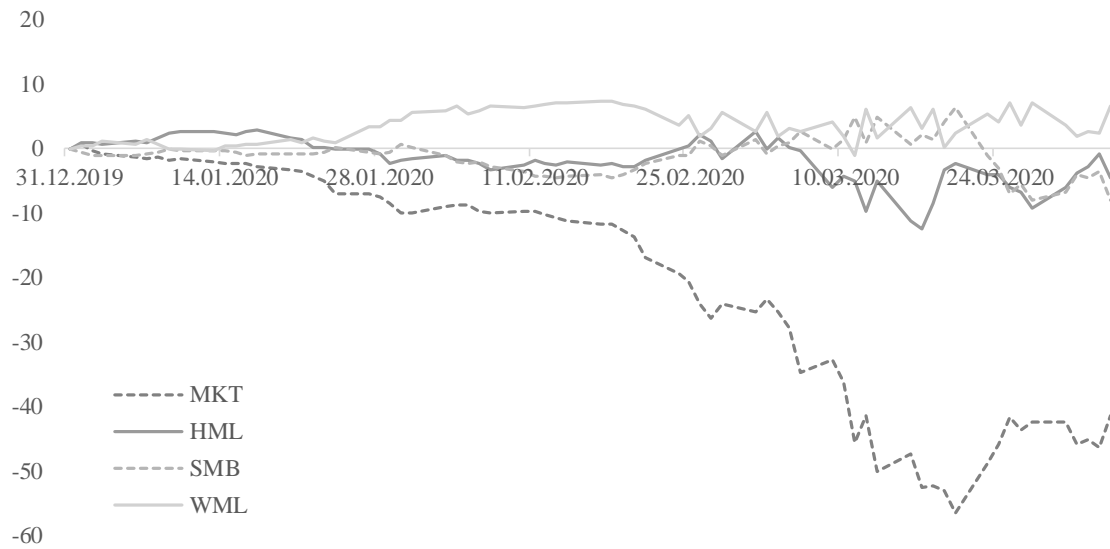

**Figure A1. Statistical Properties of Factor Returns**

The figure presents cumulative returns on the asset pricing factors used in this study: market excess return (MKT), high minus low (HML), small minus big (SMB), and winners minus losers (WML). The detailed factor construction method is presented in Table A1 in the Online Appendix and the study period is 1 January – 3 April 2020. The factors are cumulated additively and expressed in percentage.

## References

- Asness, C.S., T.J. Moskowitz, and L.H. Pedersen. 2013. "Value and Momentum Everywhere." *Journal of Finance* 68(3): 929-985.
- Carhart, M.M. 2012. "On Persistence in Mutual Fund Performance." *Journal of Finance* 52(1): 57-82.
- Fama, E.F., and K.R. French. "Common Risk Factors in the Returns on Stocks and Bonds." *Journal of Financial Economics* 33(1): 3-56.
- Umutlu, M. 2015. "Idiosyncratic Volatility and Expected Returns at the Global Level." *Financial Analyst Journal* 71(6): 58-71.
- Zaremba, A., H. Long, and A. Karathanasopoulos. 2019. "Short-Term Momentum (almost) Everywhere." *Journal of International Financial Markets, Institutions, and Money* 63: 101140.
